# Supplementary material for: Blocking ERK-DAPK1 Axis Attenuates Glutamate Excitotoxicity in Epilepsy
Source: MDPI journal article supplement (doi:10.3390/ijms23126370), 2022-06-07
Supplement: s1 [file s1]

## **Supplementary Materials**

Gan et al.

**Blocking ERK-DAPK1 axis attenuates glutamate excitotoxicity in epilepsy**

## Supplementary Figure Legends

### Figure S1. U0126 pretreatment reduces ERK and DAPK1 activity.

Mice (C57BL/6, male/female, 8-12 weeks, n=7 per group) were treated with U0126 (25 mg/kg) and brain tissues were harvested 90 min after administration. **(A-K)** Cortical and hippocampal lysates were subjected to immunoblotting analysis using anti-pSer735-DAPK1, anti-DAPK1, anti-pThr202/Tyr204 ERK, anti-ERK, anti-pSer19-MLC, anti-MLC or anti- $\beta$ -actin antibodies (\*\*P < 0.01, \*\*\*P < 0.001 vs. the control; two-tailed Student's t-test). n.s., not significant (P > 0.05). All the values were combined and are expressed as the mean  $\pm$  SD. Experiments were performed in triplicate with at least two mice per group per experiment.

### Figure S2. U0126 pretreatment decreases ERK and DAPK1 activity.

Mice (C57BL/6, male/female, 8-12 weeks, n=7 per group) were treated with U0126 (25 mg/kg) and brain tissues were harvested 180 min after administration. **(A-K)** Cortical and hippocampal lysates were subjected to immunoblotting analysis using anti-pSer735-DAPK1, anti-DAPK1, anti-pThr202/Tyr204 ERK, anti-ERK, anti-pSer19-MLC, anti-MLC or anti- $\beta$ -actin antibodies (\*\*P < 0.01, \*\*\*P < 0.001 vs. the control; two-tailed Student's t-test). n.s., not significant (P > 0.05). All the values were combined and are expressed as the mean  $\pm$  SD. Experiments were performed in triplicate with at least three mice per group per experiment.

### Figure S3. The information of Tat-DM and Tat-s-DM.

**(A-B)** High performance liquid chromatography report displays the purity (chromatogram) and relative parameters of the synthesized peptide Tat-DM or Tat-s-DM. **(C-D)** Mass Spectrometry assay shows relative parameters of the synthesized peptide Tat-DM or Tat-s-DM.

**Figure S4. Tat-DAPK1DM peptide pretreatment blocks ERK and DAPK1 interaction.**

Mice (C57BL/6, male/female, 8-12 weeks, n=7 per group) were treated with Tat-DM peptide (10 mg/kg) and brain tissues were harvested 3 or 6 h after administration. **(A-B)**

Hippocampal lysates were immunoprecipitated with non-specific IgM or anti-DAPK1 antibodies and then subjected to immunoblotting analysis using anti-DAPK1 or anti-ERK antibodies ( $***P < 0.001$ ; two-tailed Student's t-test). **(C-H)** Hippocampal lysates were subjected to immunoblotting analysis with anti-pSer735-DAPK1, anti-DAPK1, anti-pThr202/Tyr204 ERK, anti-ERK, or anti- $\beta$ -actin antibodies ( $*P < 0.05$ ,  $**P < 0.01$  vs. the control; two-tailed Student's t-test). n.s., not significant ( $P > 0.05$ ). All the values were combined and are expressed as the mean  $\pm$  SD. Experiments were performed in triplicate with at least two mice per group per experiment.

**Figure S5. Verification of S735A mutant plasmid.**

Flag-DAPK1 or Flag-DAPK1 S735A were transfected to HEK 293T cells for 48 h, and harvested cell lysates were immunoprecipitated with anti-Flag antibody and then subjected to immunoblotting analysis using anti-FLAG, anti-pSer735-DAPK1 or anti- $\beta$ -actin antibodies.

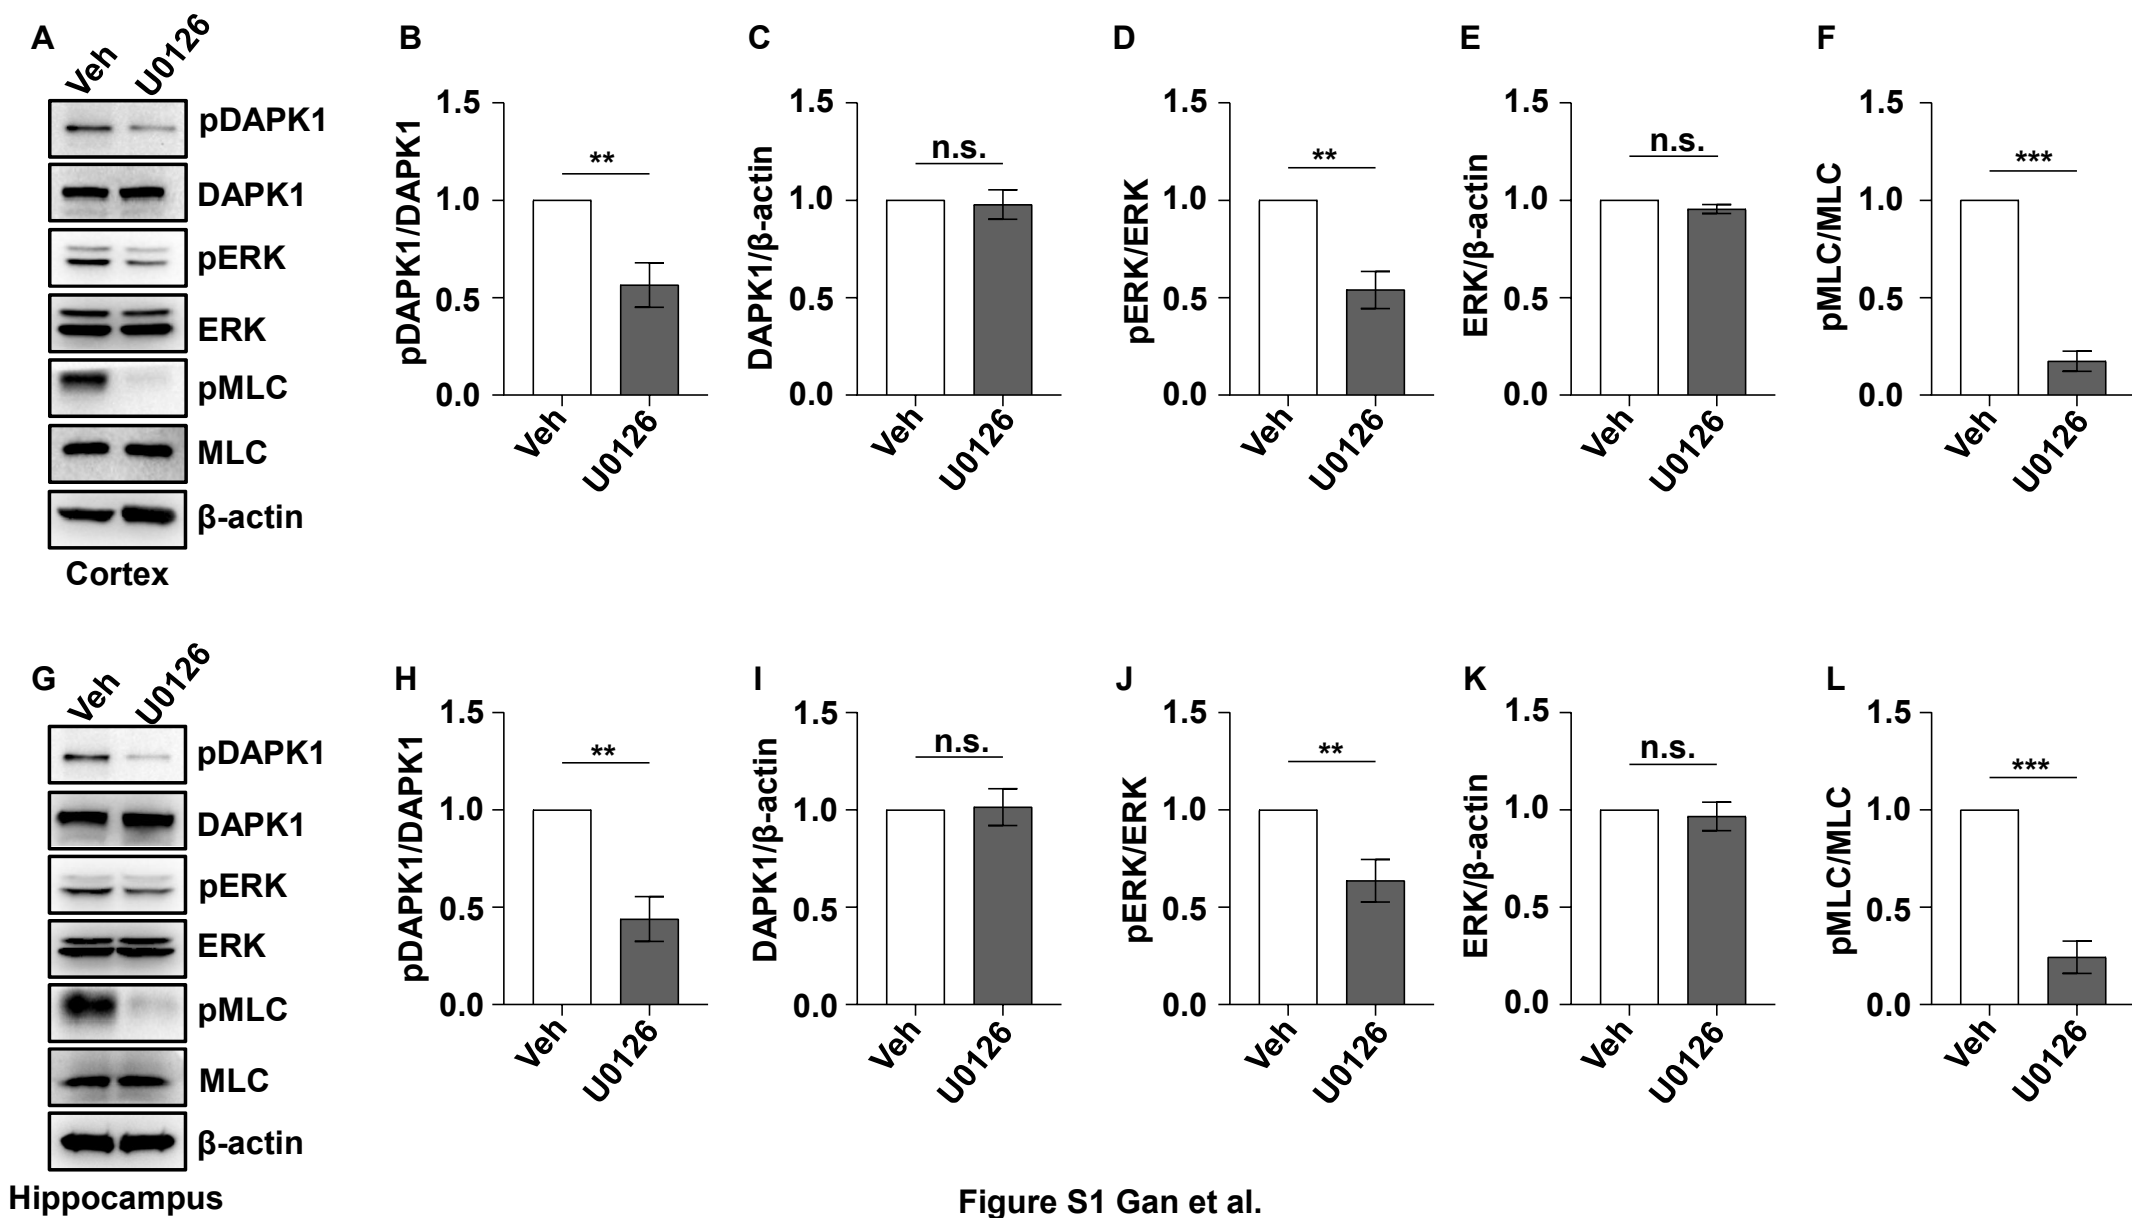

Figure S1 Gan et al.

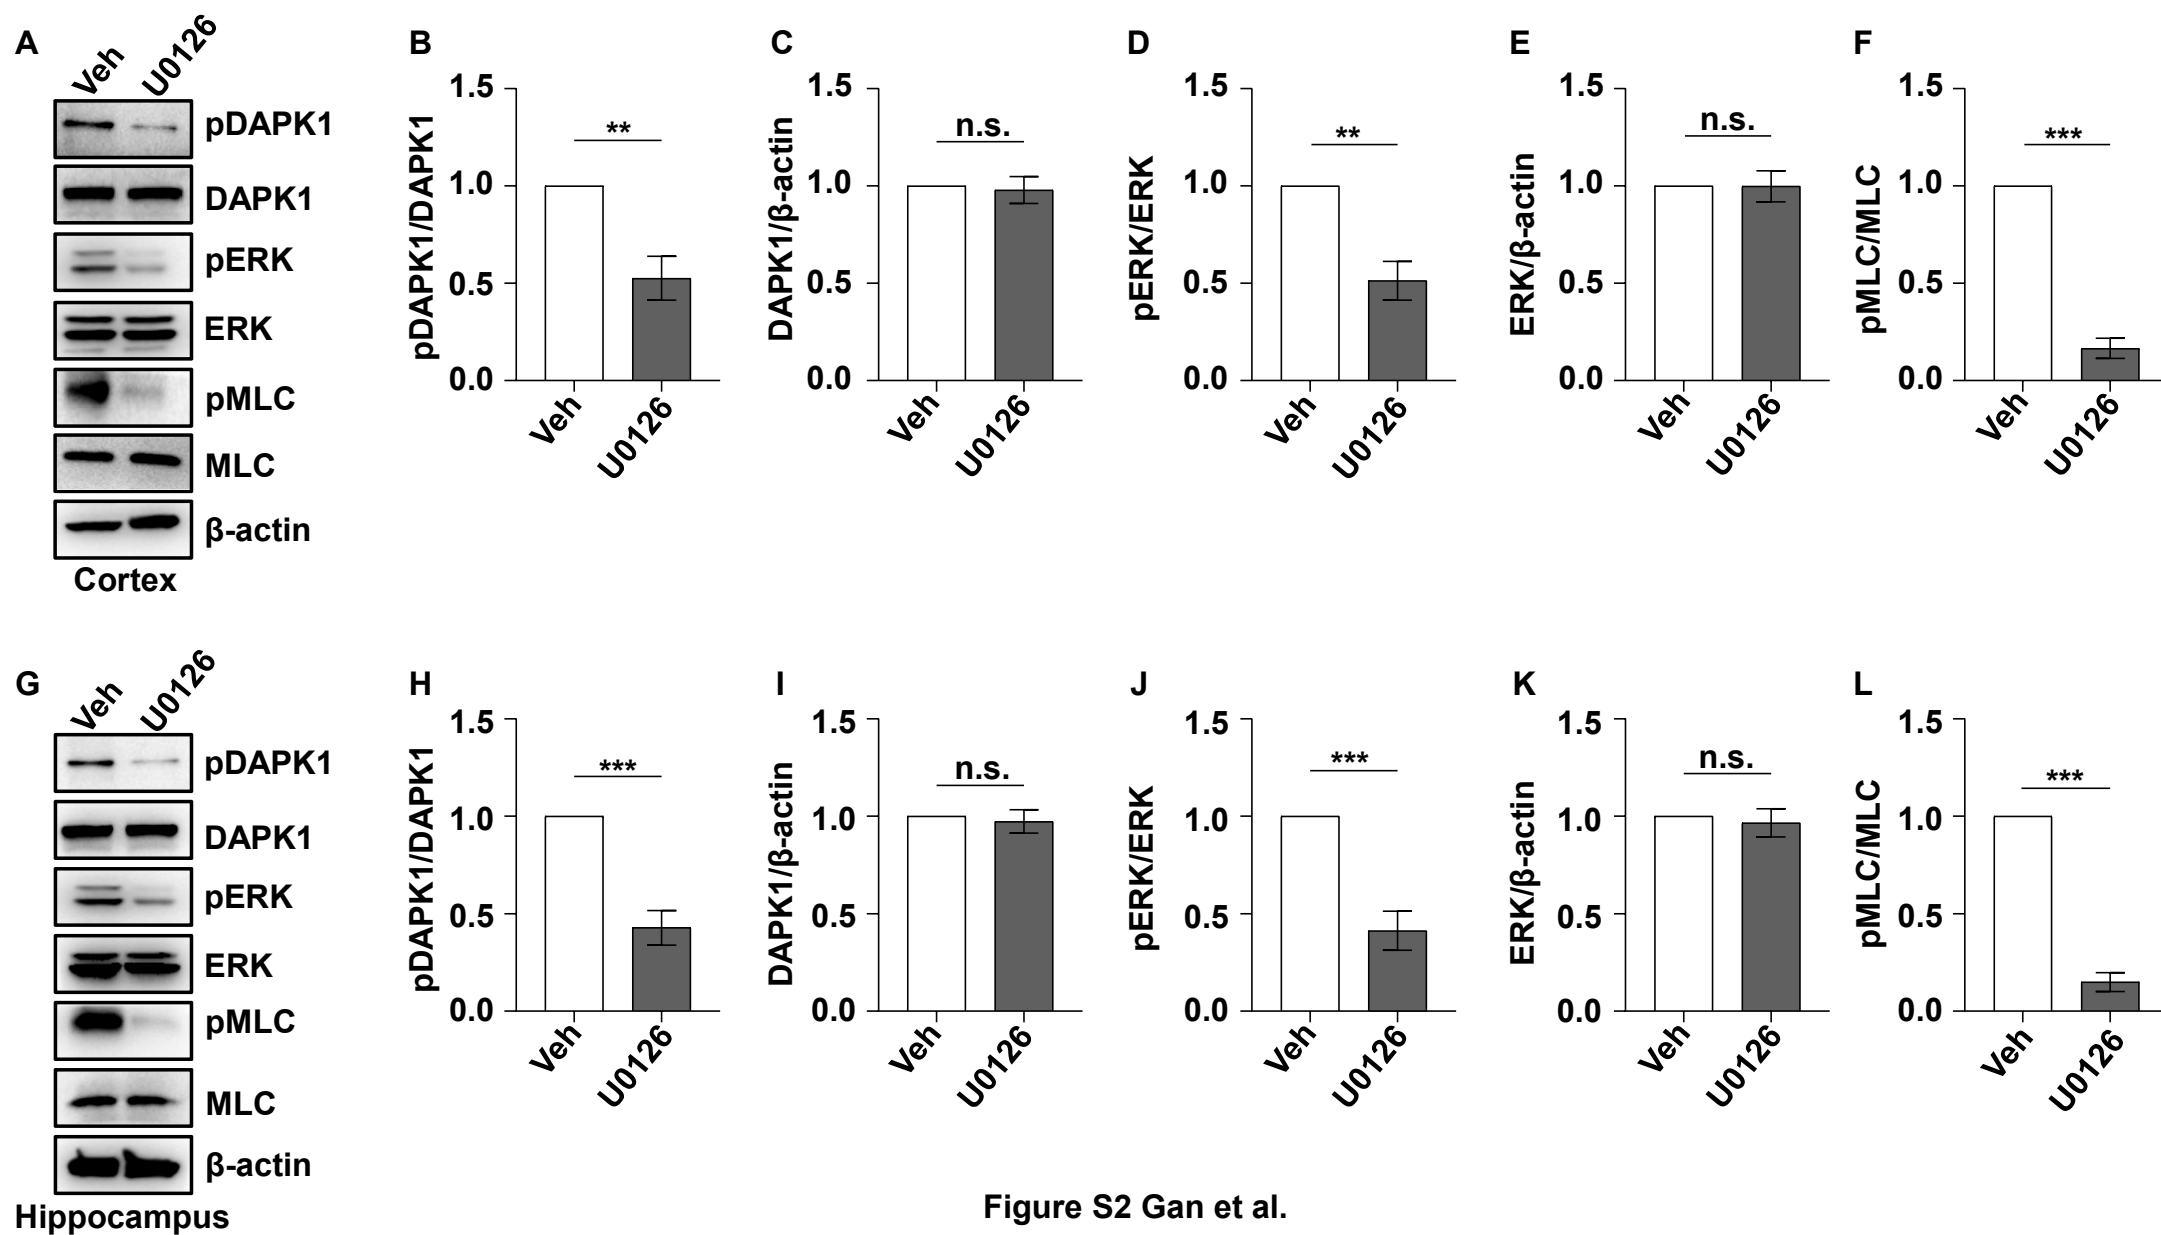

Figure S2 Gan et al.

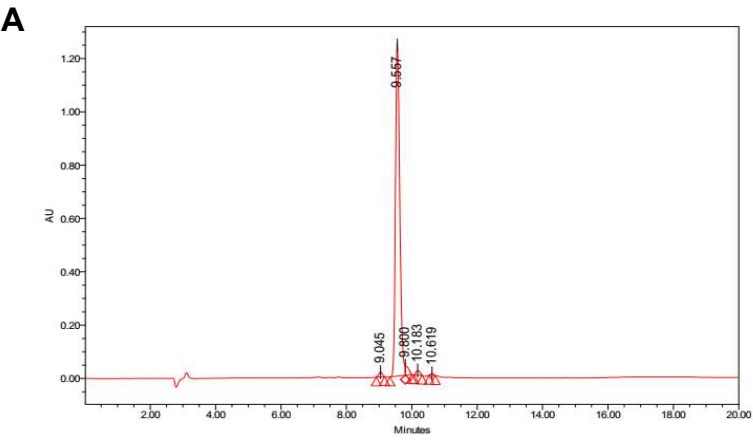

Processed Channel: 2487Channel 1

| Processed Channel | Retention Time (min) | Area     | % Area | Height  |
|-------------------|----------------------|----------|--------|---------|
| 1 2487Channel 1   | 9.045                | 135701   | 1.13   | 17961   |
| 2 2487Channel 1   | 9.557                | 11427221 | 95.19  | 1253424 |
| 3 2487Channel 1   | 9.800                | 248006   | 2.07   | 34733   |
| 4 2487Channel 1   | 10.183               | 146327   | 1.22   | 16460   |
| 5 2487Channel 1   | 10.619               | 47865    | 0.40   | 8030    |

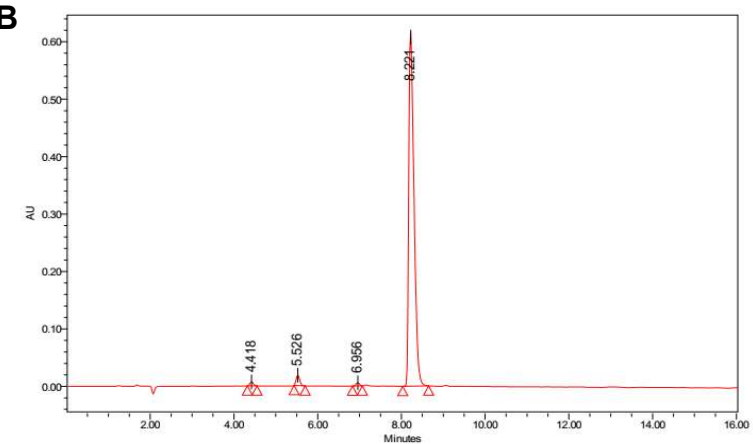

Processed Channel: 2487Channel 1

| Processed Channel | Retention Time (min) | Area   | % Area | Height |
|-------------------|----------------------|--------|--------|--------|
| 1 2487Channel 1   | 4.418                | 41969  | 0.76   | 7098   |
| 2 2487Channel 1   | 5.526                | 109724 | 1.97   | 18031  |
| 3 2487Channel 1   | 6.956                | 32436  | 0.58   | 5674   |
| 4 2487Channel 1   | 8.221                | 537346 | 96.69  | 616382 |

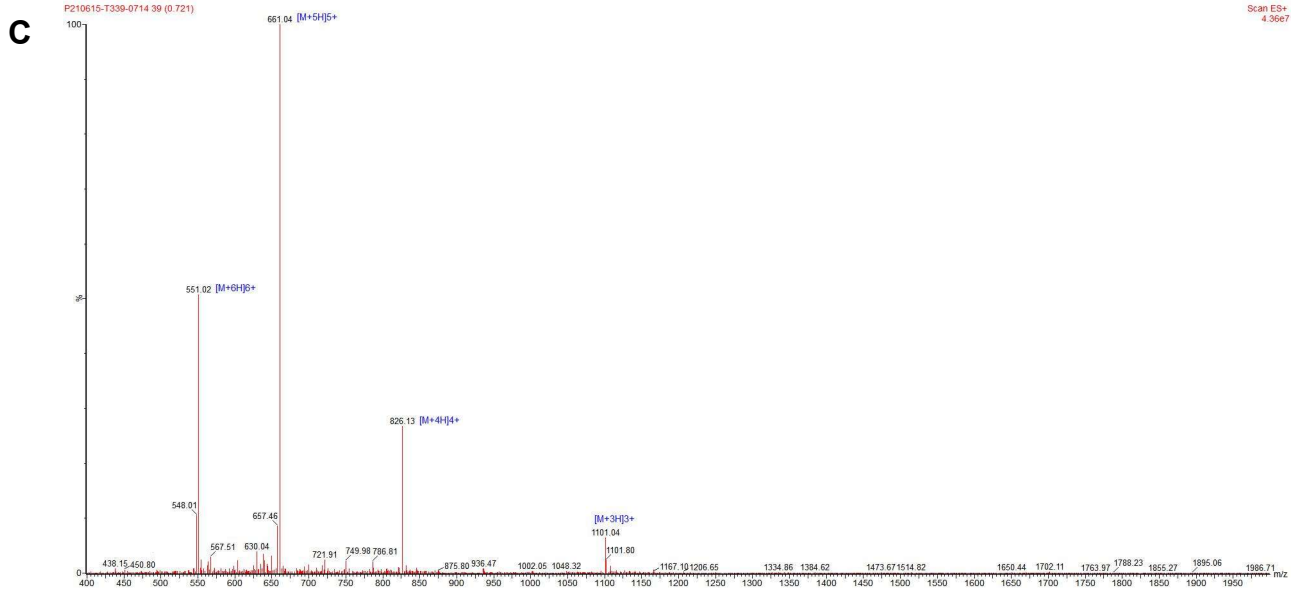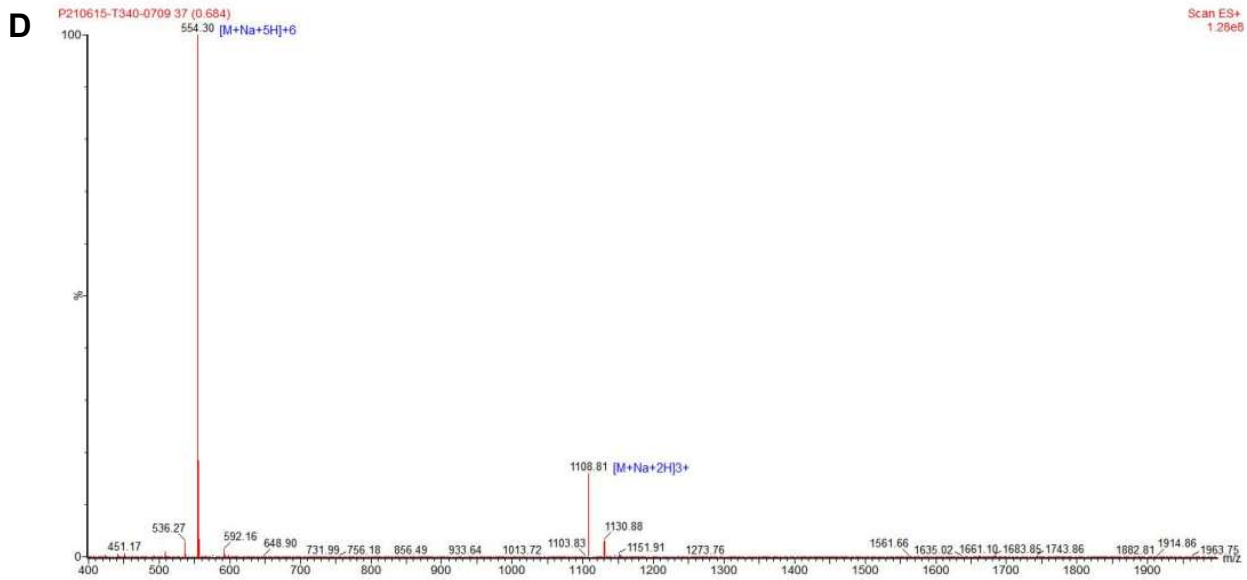

Figure S3 Gan et al.

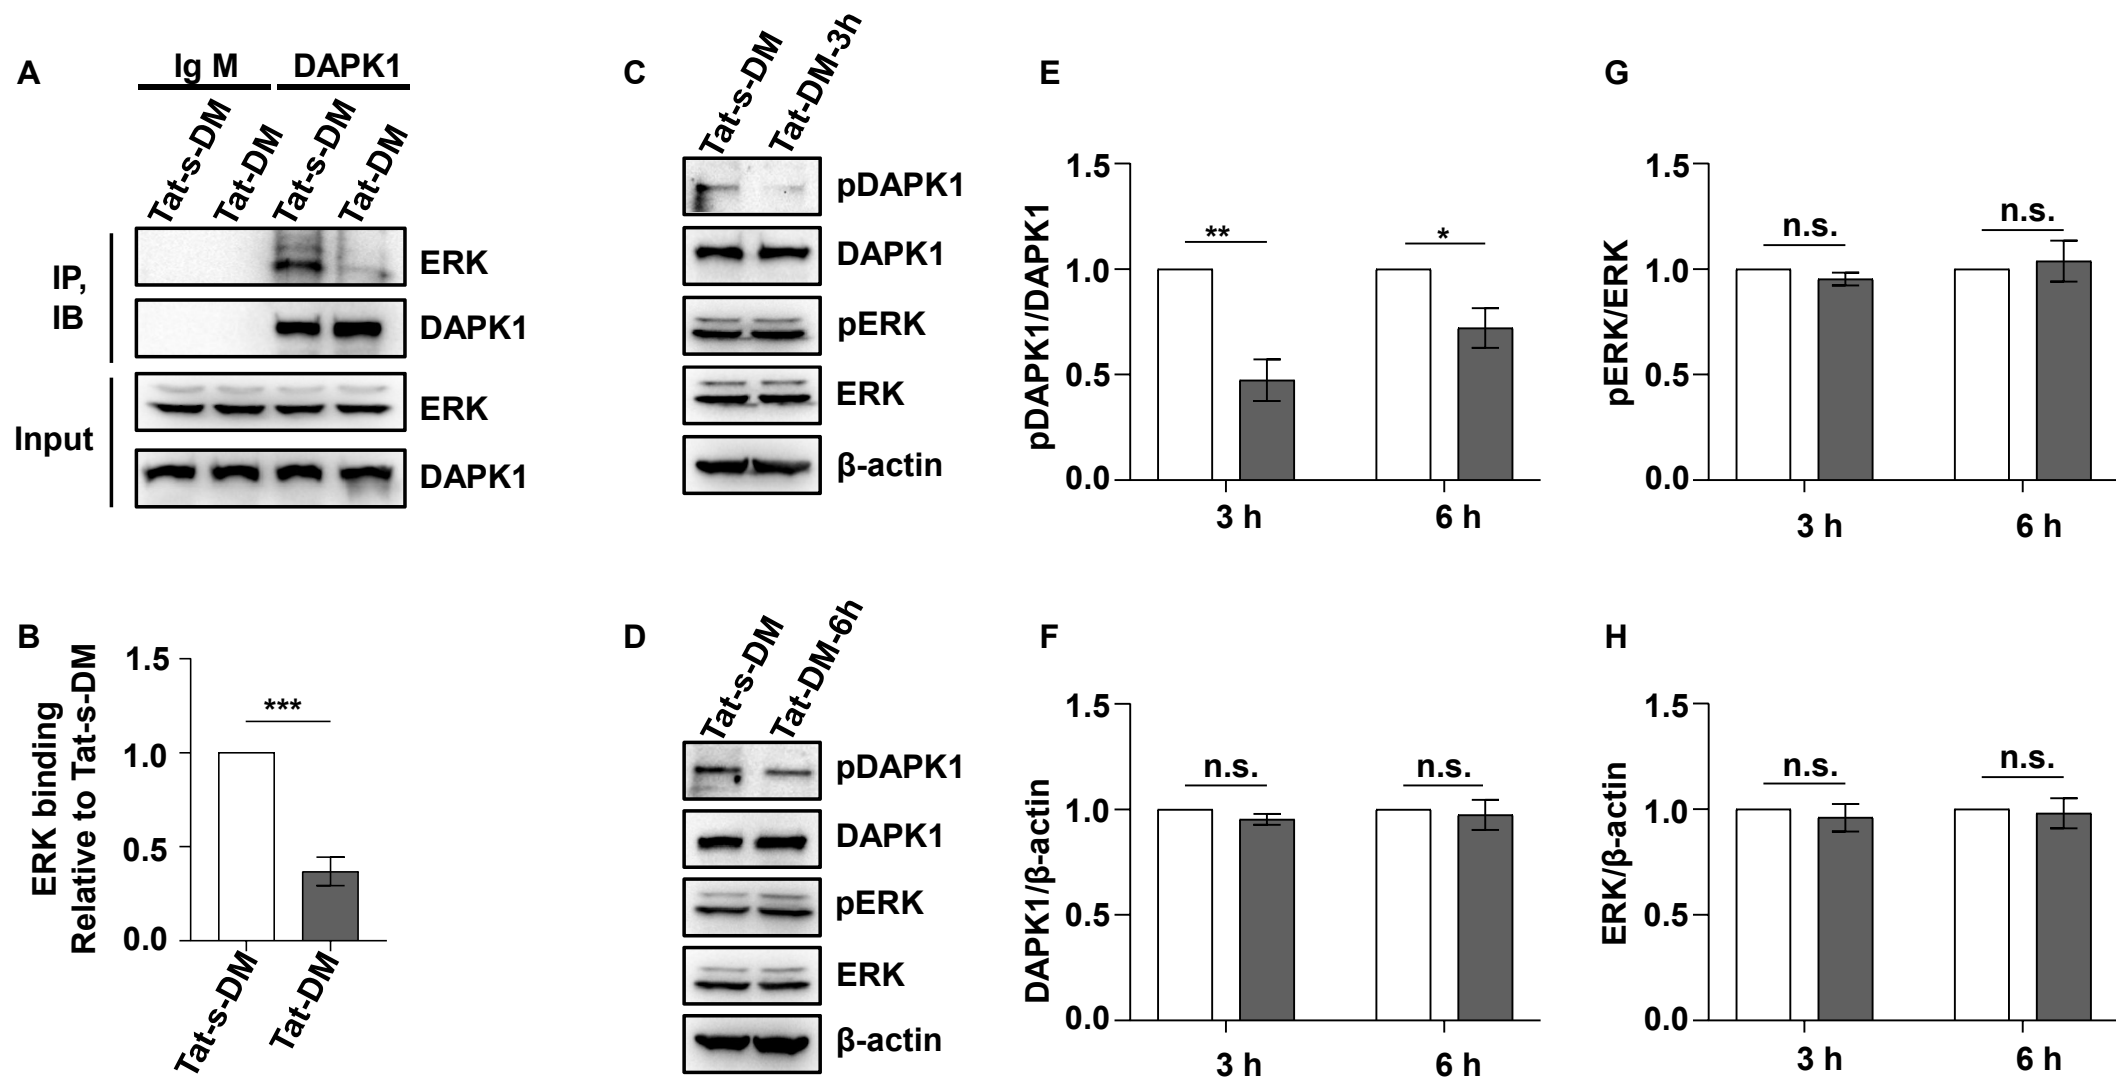

Figure S4 Gan et al.

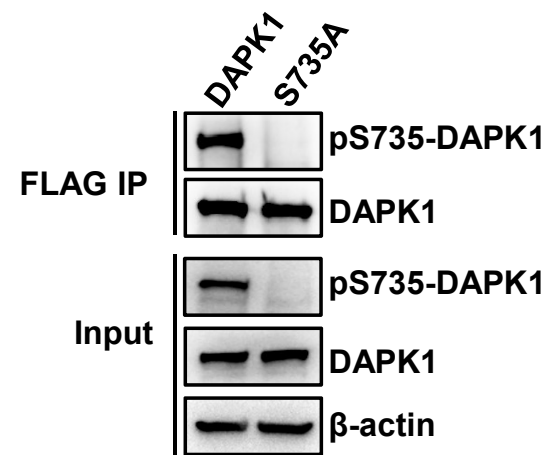

Figure S5 Gan et al.
